# Supplementary material for: GosB Inhibits Triacylglycerol Synthesis and Promotes Cell Survival in Mouse Mammary Epithelial Cells
Source: Biomed Res Int. 2017 Oct 17;2017:7394869. doi: 10.1155/2017/7394869 (PMC5664265; doi:10.1155/2017/7394869)
Supplement: Supplementary file 1 — Table S1. Primers designed for quantitative real time PCR (qPCR). [file 7394869.f1.docx]

**Supporting Information**

**Table S1. Primers designed for quantitative real time PCR (qPCR)**

| Gene | Primer sequence1 (5′-3′) | Product length (bp) | Efficiency2 |
| --- | --- | --- | --- |
| *AGPAT6* | F: AAGCAAGCTGCCCATCCTCA | 101 | 2.17 |
| R: AAACAGTGGCTCCAATTTCAA |
| *FABP4* | F: TGAAATCACCGCAGACGA | 150 | 1.99 |
| R: GAGGCTGTCAGTCCACCAA |
| *C/EBPα* | F: CGGCGGGAACGCAACAACA | 152 | 2.09 |
| R: AGCGTGTCCAGTTCACGGCTCA |
| *DGAT1* | F: CTACTGGGATCTGAGGTGCC | 101 | 2.11 |
| R: GCATCACCACACACCAATTCA |
| *FASN* | F: GGGTTCCACCACCGTGTTCCA | 226 | 2.13 |
| R: GCCCTGCTGGGCCTGCAGCTG |
| *GosB* | F: ACCCACCCTCATCTCTTCCAT | 130 | 2.14 |
| R: GCCAGTGCTGTAGGCACTCA |
| *GAPDH* | F: GCAAGTTCCACGGCACAG | 249 | 2.16 |
| R: GGTTCACACCAATCACAA |
| *LPL* | F: AGGACACTTGTCATCTCATTC | 169 | 2.18 |
| R: TTGGAGTCAGGTTCTCTCTTGTA |
| *MRPL39* | F: AGGTTCTCTTTTGTTGGCATCC | 201 | 2.13 |
| R: CTGGTCAGAGCACCGGAAGT |
| *PLIN2* | F: AGAGGTGCCGTAACTGGG | 113 | 2.16 |
| R: GTCACTGCTCCTTTGGTCTTA |
| *PLIN3* | F: CGTGGTGGATCGTGTTGCC | 140 | 1.13 |
| R: TGAGGGTCTTGACGCCTTTCT |
| *SCD* | F: TCCTTATCATTGCCAACACCA | 152 | 2.1 |
| R: CACAAGCAGCCAACCCAC |
| *SREBF1* | F: GTTTTGAACGACATCGAAGACAT | 81 | 2.2 |
| R: ATAGGGGGCGTCAAACAGG |
| *PPARγ* | F: AGTTGATTTCTCCAGCATTTC | 121 | 1.87 |
| R: TTTGATCGCACTTTGGTATT |
| *cyclinD1* | F: TCTACACTGACAACTCTATCCG | 304 | 1.76 |
| R: TAGCAGGAGAGGAAGTTGTTGG |
| *caspase9* | F: CGCCACCATCTTCTCCCTG | 99 | 2.02 |
| R: CCAACGTCTCCTTCTCCTCC |
| *Bcl-2* | F: GGTGGTGGAGGAACTCTTCA | 160 | 2.23 |
| R: CAGATGCCGGTTCAGGTACT |
| *Bax* | F: GAAGCTGAGCGAGTGTCTCC | 229 | 1.98 |
| R: GATCAGCTCGGGCACTTTAG |
| *cytochrome c* | F: GGAGGCAAGCATAAGACTGG | 131 | 2.01 |
| R: TCCATCAGGGTATCCTCTCC |
| *PCNA* | F: CTGAAGAAGGTGCTGGAGG | 197 | 1.97 |
| R: TTGGACATGCTGGTGAGG |
| *UXT* | F: TGTGGCCCTGGGATATGGTT | 101 | 2.1 |
| R: GGCTGTCGCTGAGCTCTGTG |

1F = forward primer; R = reverse primer.

2The PCR efficiency was determined by [10(−1/slope)]; the slope was obtained by the 7-point standard curve (with a minimum R2 of 0.99).
